# Supplementary material for: Internal chirality transfer in the reaction of substituted cyclic (S,O)-ketene ortho esters with aldehydes catalysed by Lewis acidElectronic supplementary information (ESI) available: Experimental details. See http://www.rsc.org/suppdata/cc/b3/b305003c/
Source: Royal Society of Chemistry journal article supplement (doi:10.1039/b305003c), 2003-01-01
Supplement: b305003c.doc [file b305003c.doc]

#
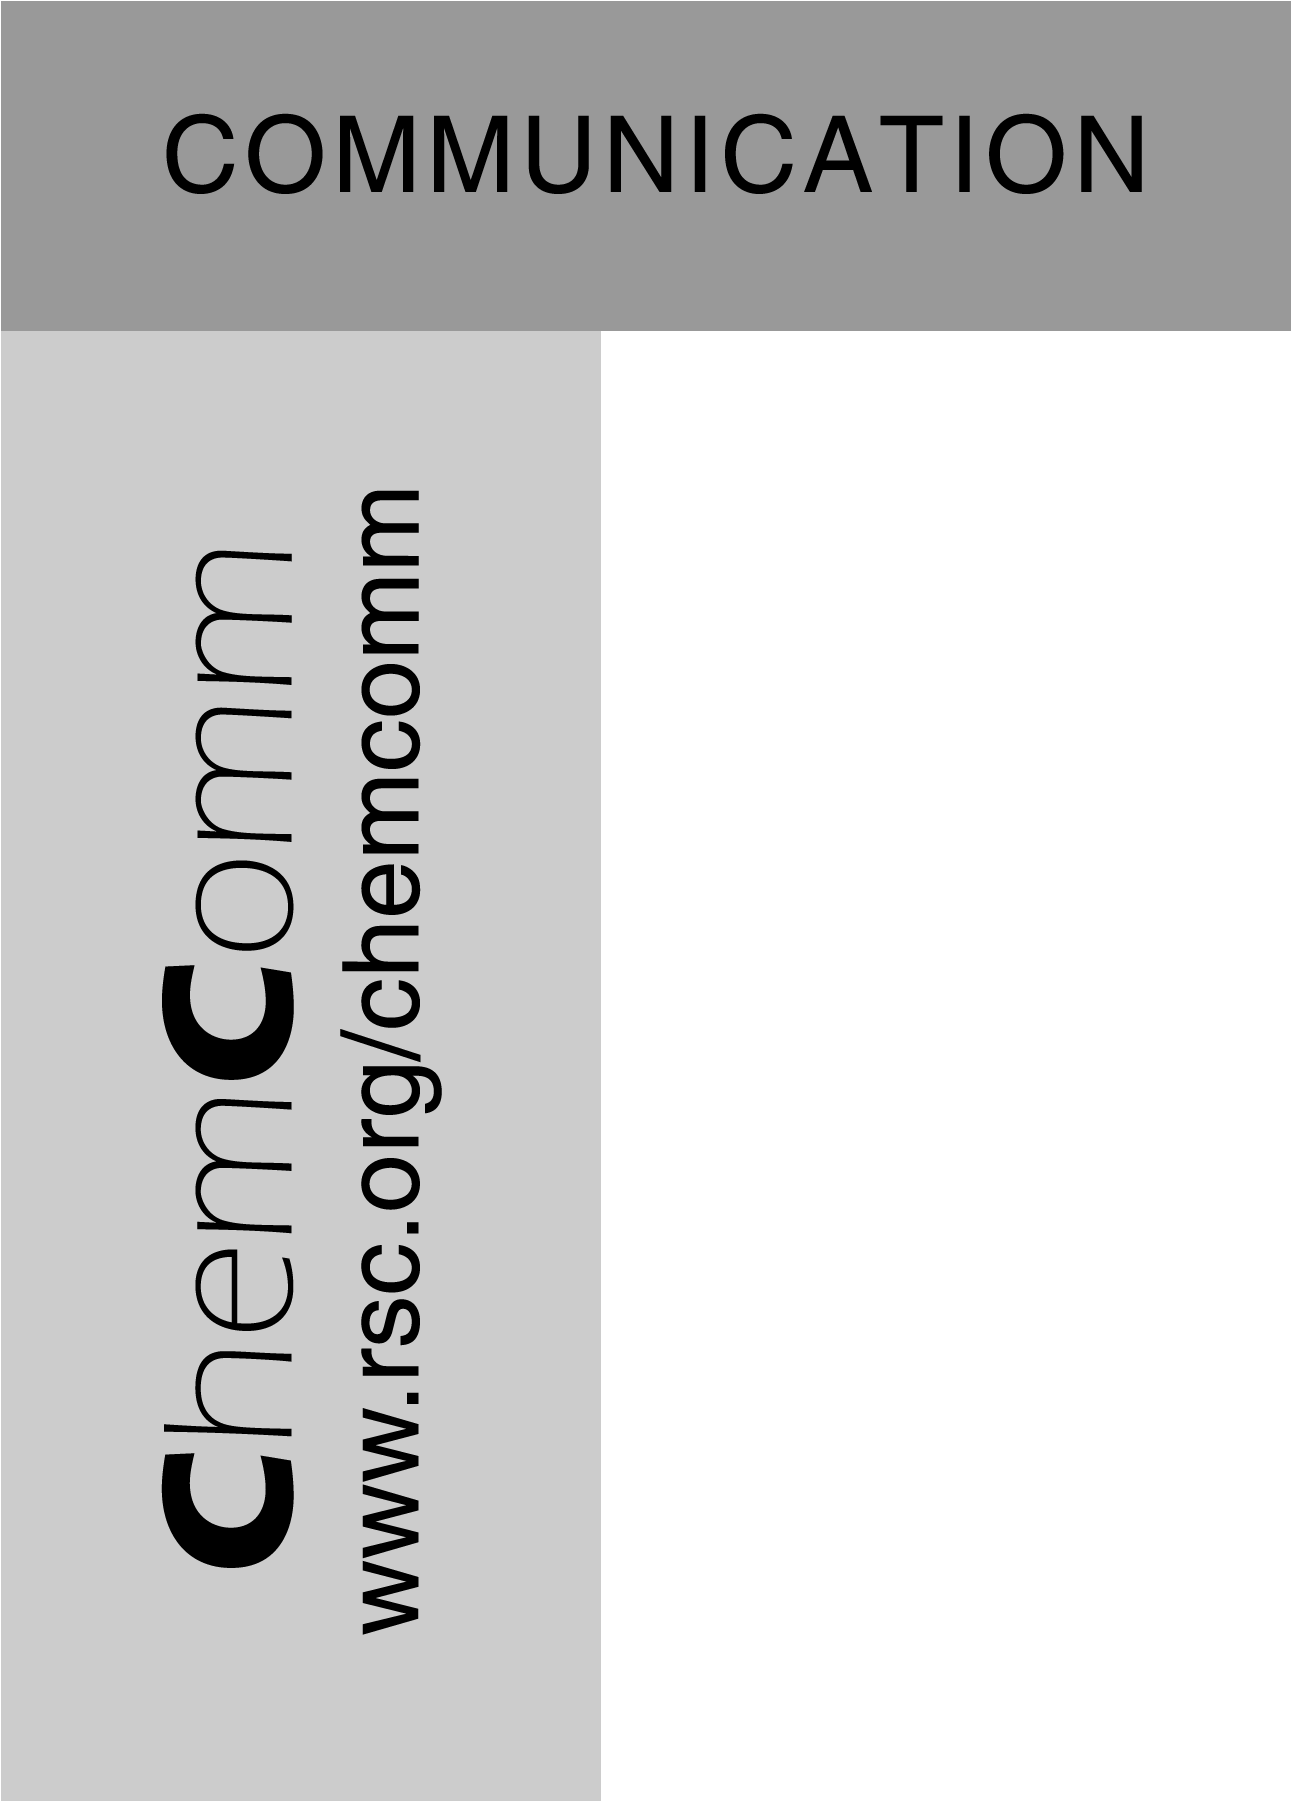
Electronic Supplementary Information

# Internal Chirality Transfer in the Reaction of Substituted

# Cyclic (*S,O*)-Ketene Ortho Esters with Aldehydes

# Catalysed by Lewis Acid

Chan-Mo Yu,* Junhee Lee, Ji-Min Kim and Su-Kyung Lee

# *Department of Chemistry and Laboratory for Metal-Catalyzed Reactions (NRL)*

# *Sungkyunkwan University, Suwon 440-746, Korea*

**General.** All reactions were run in flame-dried glassware under an atmosphere of nitrogen. Tetrahydrofuran (THF) was dried by refluxing over sodium and benzophenone until a permanent purple coloration was presented, and distilled prior to use. N,N,N',N'-Tetramethylethylenediamine (TMEDA) was distilled from CaH2, and stored over 4 A molecular sieves. Diethyl ether was also distilled from Na/benzophenone ketyl prior to use. Dichloromethane was distilled from CaH2 prior to use. Pentane was distilled from P2O5 prior to use. All liquid reagents purchased from the Aldrich were distilled properly prior to use, unless otherwise indicated. Purification was conducted by flash column chromatography on silica gel (230-400 mesh), eluting with a mixture of hexane and ethyl acetate, unless otherwise stated. Proton NMR spectra were recorded at 500 MHz in CDCl3 as a solvent with TMS or residual chloroform as the internal standard. Diastereomeric ratios of products **3**, **5**, **7**, and **9** were determined by analysis of 500 MHz 1H NMR spectra and/or by GC analysis of products using HP-1 (Hewlett-Packard, cross linked methyl siloxane, 25m X 0.32 mm X 0.52 m) column with FID detector.

**2,2-Diethoxy-6-ethylsulfanyl-3-methyl-3,4-dihydro-2*H*-pyran (1a)**: A flame-dried flask containing ButOK (5.40 g, 48 mmol) was evacuated and carefully purged with nitrogen three times and then charged with dry pentane (30 mL) followed by TMEDA (7.25 mL, 48 mmol). The solution was cooled to –78 oC in a dry ice-acetone bath, and a solution of BuLi (20 mL, 2.44 M in hexane) was added over 30 min while keeping the temperature below –50 oC. After stirring for 20 min at –78 oC, freshly distilled 2,2-diethoxy-3-methyl-2*H*-dihydropyran (7.44 g, 40 mmol) in pentane (10 mL) was added in 20 min. After –78 oC for 20 mim, the cooling bath was replaced by a dry ice-CCl4 bath and the temperature was allowed to rise to –20 oC. The temperature was maintained for 15 min, then stirring was continued for 15 min at –20 oC during which time a fine suspension in a light brown solution was formed. Precooled diethyl ether (–78 oC, 30 mL) was added via cannular at –20 oC, after which the mixture was cooled to –78 oC. Diethyl disulfide (5.0 g, 40 mmol) was then added dropwise with vigorous stirring. After stirring for 4 h at –78 oC, water (10 mL) was added to the white suspension. The organic layer was washed with water (ca 30 mL, 3X). The original aqueous layer and the washings were combined and subsequently extracted with pentane (ca 50 mL, 1X). After drying the combined organic solution over anhydrous Na2SO4, the solvents were removed under reduced pressure. Careful distillation under reduced pressure afforded **1a** (7.28 g, 29.6 mmol, 74%) as a colorless liquid: bp, 81-83 oC (4 mmHg); TLC, R*f* 0.62 (4:1 hexane/EtOAc); FT-IR(neat) 2977, 2930, 1636, 1446, 1358, 1240, 1215, 1145, 1117, 1054, 959 cm-1; 1H NMR (500MHz, CDCl3) δ 0.98 (d, *J* = 6.81 Hz, 3H), 1.27 (t, *J* = 7.12 Hz, 6H), 1.28 (t, *J* = 7.12 Hz, 3H), 1.93 (ddd, *J* = 17.01, 3.72, 6.53 Hz, 1H), 2.20 (dd, *J* = 6.53, 6.21 Hz, 1H), 2.25 (ddd, *J* = 16.71, 4.04, 6.21 Hz, 1H), 2.71 (d, J = 7.11 Hz, 2H), 3.52-3.75 (m, 4H), 5.06 (dd, *J* = 3.71, 4.04 Hz, 1H);13C NMR (125MHz, CDCl3) δ 14.5, 14.9, 15.5, 26.2, 29.1, 30.7, 57.1, 58.1, 115.3, 143.8; EIMS m/z (relative intensity) 246 (M+, 8.8), 231 (20.3), 185 (16.1), 130 (100), 101 (59.0); Anal. Calcd for C12H22O3S: C, 58.50; H, 9.00; S, 13.02. Found: C, 58.84; H, 9.17; S, 12.85.

**2,2-Diethoxy-6-ethylsulfanyl-4-methyl-3,4-dihydro-2*H*-pyran (1b)**: This compound was obtained in 63% yield according to the above procedure for **1a** as a colourless oil: 84-85 oC (4 mmHg); TLC, R*f* 0.62 (4:1 hexane/EtOAc); FT-IR (neat) 2976, 2930, 1630, 1299, 1238, 1217, 1176, 1093, 1061, 981 cm-1; 1H NMR (500MHz, CDCl3) δ 1.05 (d, *J* = 7.02 Hz, 3H), 1.18 (t, *J* = 7.02 Hz, 3H), 1.24 (t, *J* =7.02 Hz, 3H), 1.27(t, *J* = 7.02 Hz, 3H), 1.47 (dd, *J* = 11.00, 12.83 Hz, 1H), 2.07 (dd, *J* = 12.82, 6.10 Hz, 1H), 2.51-2.59 (m, 1H), 2.69-2.84 (m, 2H), 3.62-3.78 (m, 4H), 4.99-5.02 (d, *J* = 7.02 Hz, 1H); 13C NMR (125MHz, CDCl3) δ 14.8, 15.6, 20.5, 26.1, 27.3, 36.2, 57.0, 58.5, 114.0, 143.7; Anal. Calcd for C12H22O3S: C, 58.50; H, 9.00; S, 13.02. Found: C, 58.34; H, 9.07; S, 13.35.

**(2*R********,4*R********,5*S********)-4-Ethylsufanylcarbonyl-5-hydroxy-2-methyl-5-phenyl-pentanoic acid ethyl ester** **(3a): General procedure.** A flame-dried flask containing 2,2-diethoxy-6-ethylthio-2*H*-dihydropyran (**1a**, 0.50 g, 2.03 mmol) was evacuated and purged with nitrogen three times and then charged with freshly distilled CH2Cl2 (5 mL). The solution was cooled to –78 oC in a dry ice-acetone bath, benzaldehyde (0.24 g, 2.26 mmol) was added. To the resulting solution was added dropwise a solution of SnCl4 in CH2Cl2 (0.5 M, 0.81 mL, 0.405 mmol) with a gas-tight syringe. Reaction progress was monitored by TLC. The reaction was allowed to proceed for 1 h at –78 oC and then quenched by addition of 0.5 N HCl (5 mL) at –78 oC. The aqueous layer was extracted with ether (3X). The combined organic extracts were washed with saturated aqueous NaHCO3 (1X), water (1X), brine (1X), dried over anhydrous MgSO4, filtered, and concentrated under reduced pressure. Final purification was effected by column chromatography (SiO2, 25% EtOAc in hexane) to afford **3a** along with an inseparable minor diastereomer **5a** (0.57 g, 1.76 mmol, 87%) as a colorless liquid; diastereomeric ratio was 96:4 as judged by the analysis of 1H NMR of crude products: TLC, R*f* 0.31 (4:1 hexane/EtOAc); FT-IR (neat) 3583, 3490 (br), 2975, 2932, 1730, 1679, 1454, 1262, 1202, 1169, 1049, 1024 cm-1; 1H NMR (500MHz, CDCl3) δ 1.10 (d, *J* = 7.08 Hz, 3H), 1.21 (t, *J* = 7.37 Hz, 3H), 1.24 (t, *J* = 7.08 Hz, 3H), 1.66 (ddd, *J* = 4.26, 10.77, 13.89 Hz, 1H), 1.75 (ddd, *J* = 4.26, 10.77, 13.89 Hz, 1H), 2.42 (m, 1H), 2.66 (d, *J* = 5.67 Hz, 1H), 2.88(q, *J* = 7.37 Hz, 2H), 3.09 (ddd, *J* = 3.79, 7.09, 10.77 Hz, 1H), 4.08-4.15 (m, 2H), 4.80 (dd, *J* = 5.67, 7.37 Hz, 1H), 7.30-7.38 (m, 5H); 13C NMR (125MHz, CDCl3) δ 14.9, 15.1, 19.2, 24.3, 34.6, 37.9, 59.6, 61.1, 76.9, 127.1, 128.8, 129.2, 142.2, 176.3, 203.6; EIMS *m/z* (relative intensity): 324 (M+ 1.4), 309 (16.3), 263 (16.5), 245 (82.0), 234 (32.6), 217 (76.2), 199 (31.9), 173 (11.9), 157 (40.2), 143 (23.3), 128 (100), 117 (42.6), 107 (66.2), 83 (29.4), 79 (77.2); Anal. Calcd for C17H24O4S: C, 62.93; H, 7.46; S, 9.88. Found: C, 63.13; H, 7.17; S, 9.65.

**(2*R********,4*R********,5*S********)-4-Ethylsufanylcarbonyl-5-hydroxy-2-methyl-7-phenyl-heptanoic acid ethyl ester (3b)**:This compound was obtained in 81% yield according to the above procedure for **3a** as a colourless oil: TLC, R*f* 0.33 (4:1 hexane/EtOAc); FT-IR (neat) 3500 (br), 2976, 2931, 1726, 1680, 1455, 1107 cm-1; 1H NMR (500MHz, CDCl3) δ 1.17 (d, *J* = 7.02 Hz, 3H), 1.24-1.30 (m, 6H), 1.77-1.90 (m, 2H), 1.90-1.98 (m, 1H), 2.10-2.18 (m, 1H), 2.43-2.55 (m, 1H), 2.67-2.82 (m, 2H), 2.82-2.88 (m, 2H), 2.89-2.96 (m, 2H), 3.64-3.74 (m, 1H), 4.10-4.22 (m, 2H), 7.17-7.31 (m, 5H); 13C NMR (125MHz, CDCl3) δ 14.9, 17.9, 19.2, 24.3, 32.9, 34.6, 38.1, 56.7, 57.7, 61.2, 73.6, 126.6, 129.1, 129.2, 142.3, 176.6, 204.1; EIMS *m/z* (relative intensity): 352 (M+ 7.8), 335 (2.1), 307 (1.9), 305 (1.3), 291 (38.1), 273 (62.0), 262 (1.4), 245 (28.4), 227 (24.9), 217 (4.5), 199 (49.4), 181 (8.8), 171 (15.3), 157 (6.8), 129 (20.8), 117 (38.4), 101 (25.6), 91 (100), 71 (8.2), 55 (32.4), 41 (6.0); Anal. Calcd for C19H28O4S: C, 64.74; H, 8.01; S, 9.10. Found: C, 64.53; H, 8.11; S, 9.11.

**(2*R********,4*R********,5*S********)-4-Ethylsufanylcarbonyl-5-hydroxy-2-methyl-6-phenyl-hexanoic acid ethyl ester (3c)**:This compound was obtained in 83% yield according to the above procedure for **3a** as a colourless oil: TLC, R*f* 0.33 (4:1 hexane/EtOAc); FT-IR (neat) 3508 (br), 2975, 2932, 1728, 1678, 1455, 1262, 1202, 1178, 1030, 970 cm-1; 1H NMR (500MHz, CDCl3) δ 1.20 (d, *J* = 7.08 Hz, 3H), 1.25 (t, *J* = 7.09 Hz, 3H), 1.27(t, *J* = 7.37 Hz, 3H), 1.19 (ddd, *J* = 3.68, 11.05, 14.17 Hz, 1H), 2.09 (ddd, *J* = 3.12, 10.77, 14.17 Hz, 1H), 2.50 (ddd, *J* = 3.68, 7.37, 10.77 Hz, 1H), 2.70-2.84 (m, 4H), 2.91 (q, *J* = 7.37 Hz, 2H), 4.04 (ddd, *J* = 4.54, 8.50, 9.92 Hz, 1H), 4.11-4.17 (m, 2H), 7.21-7.25 (m, 3H), 7.29-7.33 (m, 2H); 13C NMR (125MHz, CDCl3) δ 14.9, 15.2, 19.4, 24.3, 31.9, 38.3, 41.5, 57.7, 61.1, 74.2, 127.3, 129.3, 130.1, 138.6, 176.7, 203.4; Anal. Calcd for C18H26O4S: C, 63.87; H, 7.74; S, 9.47. Found: C, 64.02; H, 7.61; S, 9.51.

**(2*R********,4*R********,5*S********)-4-Ethylsulfanylcarbonyl-5-hydroxy-2-methyl-undecanoic acid ethyl ester** **(3d)**: This compound was obtained in 90% yield according to the above procedure for **3a** as a colourless oil: TLC, R*f* 0.41 (85:15 hexane/EtOAc); FT-IR (neat) 3440 (br), 2957, 2930, 2872, 1733, 1685, 1455, 1177 cm-1; 1H NMR (500MHz, CDCl3) δ 0.87-0.90 (m, 6H), 1.17 (d, *J* = 7.08 Hz, 3H), 1.20-1.32 (m, 12H), 1.47-1.49 (m, 3H), 1.91-1.95 (m, 2H), 2.45-2.52 (m, 1H), 2.60-2.65 (m, 1H), 2.91 (q, *J* = 7.37 Hz, 2H), 4.15-4.18 (m, 2H); 13C NMR (125MHz, CDCl3) δ 14.7, 15.0, 15.3, 19.1, 23.3, 24.2, 26.5, 29.8, 32.4, 34.6, 36.3, 38.2, 57.7, 61.1, 74.3, 176.7, 204.0; EIMS *m/z* (relative intensity): 332 (M+ 3.0), 285 (8.4), 271 (47.4), 253 (57.1), 225(100), 207 (28.2), 179 (60.2), 151 (24.4), 128 (37.9), 101 (56.5), 83 (55.8); Anal. Calcd for C17H32O4S: C, 61.41; H, 9.70; S, 9.64. Found: C, 61.32; H, 9.61; S, 9.57.

**(2*R********,4*R********,5*S********)-5-Cyclohexyl-4-ethylsulfanylcarbonyl-5-hydroxy-2-methyl-pentan oic acid ethyl ester (3e)**: This compound was obtained in 67% yield according to the above procedure for **3a** as a colourless oil: TLC, R*f* 0.34 (85:15 hexane/EtOAc); FT-IR (neat) 3500 (br), 2929, 1729, 1682, 1455 cm-1; 1H NMR (500MHz, CDCl3) δ 0.95-1.04 ( m, 3H), 1.19 (d, *J* = 6.94 Hz, 3H), 1.24-1.28 (m, 9H), 1.32-1.46 (m, 3H), 1.62-1.71 (m, 2H), 1.74-1.81 (m, 1H), 1.86-1.90 (m, 2H), 2.01-2.07 (m, 1H), 2.41-2.51 (m, 1H), 2.86-2.95 (m, 2H), 3.51 (dd, *J* = 3.24, 7.54 Hz, 1H), 4.12-4.23 (m, 2H); 13C NMR (125MHz, CDCl3) δ 14.9, 15.2, 19.6, 24.2, 26.5, 26.7, 27.0, 30.6, 32.3, 38.3, 40.9, 54.9, 61.1, 176.8, 204.5; Anal. Calcd for C17H30O4S: C, 61.78; H, 9.15; S, 9.70. Found: C, 61.54; H, 9.21; S, 9.81.

**(2*R********,4*R********,5*S********)-4-Ethylsufanylcarbonyl-5-hydroxy-2-methyl-7-phenyl-hept-6-enoic acid ethyl ester** **(3f)**: This compound was obtained in 59% yield according to the above procedure for **3a** as a colourless oil: TLC, R*f* 0.27 (4:1 hexane/EtOAc); FT-IR (neat) 3404 (br), 2976, 2932, 1726, 1680, 1108 cm-1; 1H NMR (500MHz, CDCl3) δ 1.17 (d, *J* = 7.08 Hz, 3H), 1.23 (t, *J* = 7.37 Hz, 3H), 1.27 (t, *J* = 7.08 Hz, 3H), 1.86 (m, 2H), 1.95 (ddd, *J* = 3..97, 10.49, 13.89Hz, 1H), 2.45 (d, *J* = 6.80 Hz, 1H), 2.51 (m, 1H), 2.87-2.97 (m, 3H), 4.10-4.21 (m, 2H), 6.19 (dd, *J* = 6.52, 15.87 Hz, 1H), 6.63 (d, *J* = 15.87 Hz, 1H), 7.24-7.45 (m, 5H); 13C NMR (125MHz, CDCl3) δ 14.6, 14.9, 18.9, 23.9, 33.8, 37.6, 57.8, 60.8, 74.7, 126.9, 128.1, 128.8, 129.6, 132.2, 136.6, 176.2, 202.6; EIMS *m/z* (relative intensity): 335 (M+-CH3, 0.9), 321(2.1), 303(6.6), 289(21.2), 260(7.1), 243(39.0), 225(3.4), 214(34.8), 197(9.2), 187(5.2), 173(21.1), 156(5.9), 141(11.4), 133(100), 115(41.8), 102(21.9), 91(31.1), 77(33.6), 55(71.5), 41(8.8); Anal. Calcd for C19H26O4S: C, 65.11; H, 7.48; S, 9.15. Found: C, 65.34; H, 7.31; S, 9.33.

**(2*R********,4*S********,5*S********)-4-Ethylsufanylcarbonyl-5-hydroxy-2-methyl-5-phenyl-pentanoic acid ethyl ester (5a)**: **General procedure.** A flame-dried flask containing 2,2-diethoxy-6-ethylthio-2*H*-dihydropyran (**1a**, 0.50 g, 2.03 mmol) was evacuated and purged with nitrogen three times and then charged with freshly distilled toluene (5 mL). The solution was cooled to –78 oC in a dry ice-acetone bath, and benzaldehyde (0.24 g, 2.26 mmol) was added. To the resulting solution was added dropwise a solution of SnCl4 in toluene (0.5 M, 0.82 mL, 0.41 mmol) with a gas-tight syringe. The reaction progress was monitored by TLC. After stirring 3 h at –78 oC, distilled pyridine (2.5 mL, 2.44g, 31 mmol) and 1,8-diazabicyclo[5,4,0]undec-7-ene (DBU, 2.17 g, 14.25 mmol) was added dropwise at this temperature. After 30 min at –78 oC, the resulting mixture was allowed to warm to room temperature and then 50 oC in an oil bath. After 7 h, the mixture was cooled to 0 oC and then quenched by addition of a solution of 1:1 aqueous 20% HCl/EtOH. The aqueous layer was extracted with ether (3X). The combined organic extracts were washed with saturated aqueous NaHCO3 (1X), water (1X), brine (1X), dried over anhydrous MgSO4, filtered, and concentrated under reduced pressure. Final purification was effected by column chromatography (SiO2, 20% EtOAc in hexane) to afford **5a** along with an inseparable minor diastereomer **3a** (0.554 g, 1.71 mmol, 84%) as a colourless liquid; diastereomeric ratio was >98:2 as judged by the analysis of 500 MHz 1H NMR of crude products: TLC, R*f* 0.31 (4:1 hexane/EtOAc); FT-IR (neat) 3499 (br), 2976, 2931, 1728, 1680, 1455, 1178, 1107,1047 cm-1; 1H NMR (500MHz, CDCl3) δ 1.07 (d, *J* = 7.09 Hz, 3H), 1.16 (t, *J* = 7.37 Hz, 3H), 1.23 (t, *J* = 7.09 Hz, 3H), 1.75 (ddd, *J* = 3.97, 8.50, 14.17 Hz, 1H), 2.23 (ddd, *J* = 3.97, 9.35, 14.17 Hz, 1H), 2.30-2.38 (m, 1H), 2.81 (q, *J* = 7.37 Hz, 2H), 2.84-2.88(m, 1H), 2.95 (ddd, *J* = 4.25, 5.10, 9.35 Hz, 1H), 4.03-4.13 (q, *J* = 7.09 Hz, 2H), 4.98 (d, *J* = 5.10 Hz, 1H), 7.26-7.34 (m, 5H); 13C NMR (125MHz, CDCl3) δ 14.2, 14.3, 18.7, 23.5, 30.8, 37.8, 57.5, 60.4, 71.9, 125.9, 126.1, 128.5, 141.6, 176.0, 203.0; Anal. Calcd for C17H24O4S: C, 62.93; H, 7.46; S, 9.88. Found: C, 62.91; H, 7.44; S, 9.76.

**(2*R********,4*S********,5*S********)-4-Ethylsufanylcarbonyl-5-hydroxy-2-methyl-7-phenyl-heptanoic acid ethyl ester** **(5b)**: This compound was obtained in 74% yield according to the above procedure for **5a** as a colourless oil: TLC, R*f* 0.33 (4:1 hexane/EtOAc); FT-IR(neat) 3400 (br), 2976, 2932, 1730, 1678, 1455, 1377, 1262, 1179, 1033 cm-1; 1H NMR (500MHz, CDCl3) δ 1.18 (d, *J* = 7.09 Hz, 3H), 1.25 (t, *J* = 7.37 Hz, 3H), 1.26 (t, *J* = 7.08 Hz,, 3H), 1.69-1.79 (m, 1H), 1.80-1.88 (m, 1H), 1.96 (ddd, *J* = 3.12, 11.06, 14.17 Hz, 1H), 2.33 (d, *J* = 3.68 Hz, 1H), 2.45-2.50 (m, 1H), 2.63-2.69 (m, 2H), 2.72 (ddd, *J* = 3.40, 3.40, 11.34 Hz, 1H), 3.83 (ddd, *J* = 5.39, 9.93, 13.61 Hz, 1H), 2.89 (q, *J* = 7.37 Hz, 2H), 3.80-3.88 (m, 1H), 4.14 (q, *J* = 7.08 Hz, 2H), 7.19-7.36 (m, 5H); 13C NMR (125MHz, CDCl3) δ 14.5, 17.0, 19.5, 23.6, 31.3, 37.3, 57.3, 60.5, 73.3, 76.4, 126.6, 127.6, 128.6, 131.9, 136.5, 176.1, 201.6; Anal. Calcd for C19H28O4S: C, 64.74; H, 8.01; S, 9.10. Found: C, 64.53; H, 8.11; S, 9.11.

**(2*R********,4*S********,5*S********)-4-Ethylsufanylcarbonyl-5-hydroxy-2-methyl-6-phenyl-hexanoic acid ethyl ester (5c)**:This compound was obtained in 80% yield according to the above procedure for **5a** as a colourless oil: TLC, R*f* 0.33 (4:1 hexane/EtOAc); FT-IR (neat) 3500 (br), 2967, 2924, 1730, 1678, 1455, 1162, 1096, 1074, 1039 cm-1; 1H NMR (500MHz, CDCl3) δ 1.16 (d, *J* = 7.09 Hz, 3H), 1.23 (t, *J* = 7.08 Hz, 3H), 1.29 (t, *J* = 7.37 Hz, 3H), 1.91-1.95 (m, 2H), 2.01-2.08 (m, 2H), 2.74 (dd, *J* = 8.51, 13.89 Hz, 1H), 2.80 (ddd, *J* = 4.83, 4.83, 11.12 Hz, 1H), 2.88 (dd, *J* = 4.83, 13.89 Hz, 1H), 2.95 (q, *J* = 7.37 Hz, 2H), 3.90 (ddd, *J* = 4.82, 4.82, 8.50 Hz, 1H), 4.10-4.16 (m, 2H), 7.21-7.32 (m, 5H); 13C NMR (125MHz, CDCl3) δ 14.9, 15.2, 19.0, 24.3, 34.5, 38.1, 42.5, 57.6, 61.1, 75.2, 127.3, 129.2, 130.0, 138.6, 176.5, 203.6; Anal. Calcd for C18H26O4S: C, 63.87; H, 7.74; S, 9.47. Found: C, 63.97; H, 7.71; S, 9.54.

**(2*R********,4*S********,5*S********)-4-Ethylsulfanylcarbonyl-5-hydroxy-2-methyl-undecanoic acid ethyl ester (5d):** This compound was obtained in 81% yield according to the above procedure for **5a** as a colourless oil: TLC, R*f* 0.41 (85:15 hexane/EtOAc); FT-IR (neat) 3500 (br), 2958, 2931, 2867, 1733, 1682, 1455, 1179 cm-1; 1H NMR (500MHz, CDCl3) δ 0.86-0.90 (m, 3H), 1.19 (d, *J* = 7.08 Hz, 3H), 1.24-1.33 (m, 12H), 1.42-1.51 (m, 2H), 1.67-1.75 (m, 1H), 1.77-1.97 (m, 2H), 2.16-2.23 (m, 1H), 2.37 (d, *J* = 3.06 Hz, 1H), 2.42-2.54 (m, 1H), 2.64-2.71 (m, 1H), 2.88-2.94 (m, 2H), 3.76-3.84 (m, 1H), 4.09-4.21 (m, 2H); 13C NMR (125MHz, CDCl3) δ 14.8, 15.0, 15.3, 19.5, 23.3, 24.2, 26.6, 29.8, 31.2, 32.4, 34.9, 38.3, 58.1, 61.1, 73.2, 176.8, 204.0; Anal. Calcd for C17H32O4S: C, 61.41; H, 9.70; S, 9.64. Found: C, 61.52; H, 9.63; S, 9.68.

**(2*R********,4*S********,5*S********)-5-Cyclohexyl-4-ethylsulfanylcarbonyl-5-hydroxy-2-methyl-pentan oic acid ethyl ester** **(5e)**: This compound was obtained in 67% yield according to the above procedure for **5a** as a colourless oil: TLC R*f* 0.34 (85:15 hexane/EtOAc); FT-IR (neat) 3500 (br), 2972, 2929, 1732, 1680, 1455 cm-1; 1H NMR (500MHz, CDCl3) δ 0.99-1.10 ( m, 3H), 1.19 (d, *J* = 6.96 Hz, 3H), 1.18-1.28 (m, 9H), 1.37-1.46 (m, 1H), 1.53-1.60 (m, 1H), 1.65-1.71 (m, 2H), 1.73-1.81 (m, 2H), 1.99-2.06 (m, 1H), 2.15-2.26 (m, 1H), 2.36 (d, *J* = 3.48 Hz, 1H), 2.44-2.52 (m, 1H), 2.87-2.98 (m, 2H), 3.55-3.60 (m, 1H), 4.10-4.16 (m, 2H); 13C NMR (125MHz, CDCl3) δ 14.9, 15.3, 17.4, 26.5, 26.8, 27.0, 29.0, 30.2, 31.6, 37.8, 41.0, 54.2, 61.2, 177.0, 203.7; Anal. Calcd for C17H30O4S: C, 61.78; H, 9.15; S, 9.70. Found: C, 61.64; H, 9.11; S, 9.68.

**(2*R********,4*S********,5*S********)-4-Ethylsufanylcarbonyl-5-hydroxy-2-methyl-7-phenyl-hept-6-enoic acid ethyl ester (5f)**:This compound was obtained in 55% yield according to the above procedure for **5a** as a colourless oil: TLC, R*f* 0.27 (4:1 hexane/EtOAc); FT-IR (neat) 3487 (br), 2977, 2933, 1729, 1682, 1452, 1378, 1263, 1227, 1203, 1175, 1108, 968 cm-1; 1H NMR (500MHz, CDCl3) δ 1.18 (d, *J* = 7.08 Hz, 3H), 1.22 (t, *J* = 7.65 Hz, 3H), 1.24 (t, *J* = 7.09 Hz, 3H), 1.80 (ddd, *J* = 4.53, 8.22, 14.18 Hz, 1H), 2.21 (ddd, *J* = 6.23, 9.07, 14.18 Hz, 1H), 2.49-2.57 (m, 3H), 2.89 (q, *J* = 7.09 Hz, 2H), 4.14 (q, *J* = 7.65 Hz, 2H), 4.52-4.59 (m, 1H), 6.18 (dd, *J* = 6.52, 15.87 Hz, 1H), 6.63 (d, *J* = 15.87 Hz, 1H), 7.23-7.40 (m, 5H); 13C NMR (125MHz, CDCl3) δ 14.2, 14.4, 16.7, 23.5, 30.6, 37.3, 58.9, 60.4, 74.3, 74.5, 76.4, 126.2, 127.8, 128.3, 141.1, 176.1, 202.2; Anal. Calcd for C19H26O4S: C, 65.11; H, 7.48; S, 9.15. Found: C, 61.54; H, 7.21; S, 8.81.

**(3*R********,4*R********,5*S********)-4-Ethylsufanylcarbonyl-5-hydroxy-3-methyl-5-phenyl-pentanoic**  **acid ethyl ester (7a)**: This compound was obtained in 77% yield according to the above procedure for **3a** as a colourless oil: TLC, R*f* 0.35 (4:1 hexane/EtOAc); FT-IR (neat) 3500 (br), 2971, 1733, 1675, 1179, 1028 cm-1; 1H NMR (500MHz, CDCl3) δ 1.10 (d, *J* = 7.37 Hz, 3H), 1.16 (d, *J* = 6.81 Hz, 3H), 1.21 (t, *J* = 7.08 Hz, 3H), 2.15 (dd, *J* = 9.35, 15.30 Hz, 1H), 2.45 (m, 1H), 2.52 (dd, *J* = 3.68, 15.30 Hz, 1H), 2.77 (q, *J* = 7.37 Hz, 2H), 2.91 (dd, *J* = 5.39, 7.65 Hz, 1H), 3.23 (d, *J* = 7.09 Hz, 1H), 4.12 (q, *J* = 7.08 Hz, 2H), 5.03 (dd, *J* = 7.65, 5.39 Hz, 1H), 7.27-7.35 (m, 5H); 13C NMR (125MHz, CDCl3) δ 14.9, 15.0, 18.8, 24.2, 29.9, 39.4, 61.1, 65.5, 73.7, 126.5, 128.3, 129.0, 142.5, 172.9, 230.7; EIMS *m/z* (relative intensity): 324 (M+ 5.1), 307 (28.3), 246 (2.3), 263 (12.9), 245 (73.1), 234 (21.5), 218 (28.6), 199 (40.1), 157 (100), 147(21.8), 128(87.6), 115(17.1), 107(65.5), 91(35.7), 79(83.4), 55(14.7), 41(13.0); Anal. Calcd for C17H24O4S: C, 62.93; H, 7.46; S, 9.88. Found: C, 62.97; H, 7.44; S, 9.76.

**(3*R********,4*R********,5*S********)-4-Ethylsufanylcarbonyl-5-hydroxy-3-methyl-7-phenyl-heptanoic acid ethyl ester (7b)**: This compound was obtained in 78% yield according to the above procedure for **3a** as a colourless oil: TLC, R*f* 0.39 (4:1 hexane/EtOAc); FT-IR (neat) 3500 (br), 2929, 1731, 1677 cm-1; 1H NMR (500MHz, CDCl3) δ 1.08 (d, *J* = 7.09 Hz, 3H), 1.24 (t, *J* = 7.66 Hz, 3H), 1.25 (t, *J* = 7.08 Hz, 3H), 1.72-1.80 (m, 2H), 2.15 (dd, *J* = 5.95, 16.72 Hz, 1H), 2.82-2.84 (m, 1H), 2.59-2.68 (m, 2H), 2.87-2.94 (m, 2H), 2.86 (q, *J* = 7.66 Hz, 2H), 3.28 (d, *J* = 4.82 Hz, 1H), 3.72-3.73 (m, 1H), 4.14 (q, *J* = 7.08 Hz, 2H), 7.15-7.28 (m, 5H); 13C NMR (125MHz, CDCl3) δ 14.8, 15.3, 20.9, 24.3, 29.3, 32.7, 37.3, 36.1, 61.5, 65.7, 70.3, 126.5, 129.0, 129.1, 142.6, 175.2, 201.4; EIMS *m/z* (relative intensity): 352 (M+ 6.7), 335 (3.8), 307 (3.2), 294 (1.0), 291 (35.3), 273 (49.1), 262 (1.8), 245 (25.2), 227 (32.0), 218 (5.4), 199 (25.7), 185 (8.0), 171 (6.0), 157 (64.6), 139 (4.8), 129 (35.9), 117 (82.7), 101 (26.1), 91 (100); Anal. Calcd for C19H28O4S: C, 64.74; H, 8.01; S, 9.10. Found: C, 64.61; H, 8.04; S, 9.02.

**(3*R********,4*R********,5*S********)-4-Ethylsufanylcarbonyl-5-hydroxy-3-methyl-6-phenyl-hexanoic** **acid ethyl ester (7c)**:This compound was obtained in 75% yield according to the above procedure for **3a** as a colourless oil: TLC, R*f* 0.34 (4:1 hexane/EtOAc); FT-IR (neat) 3500 (br), 2971, 2933, 1733, 1676, 1454, 1376, 1264, 1033, 1009 cm-1; 1H NMR (500MHz, CDCl3) δ 1.12 (d, *J* = 7.24 Hz, 3H), 1.24 (t, *J* = 7.25 Hz, 3H), 1.28 (t, *J* = 7.54 Hz, 3H), 2.20 (dd, *J* = 7.54, 16.24 Hz, 1H), 2.58 (br, 1H), 2.61 (dd, *J* = 9.56, 13.91 Hz, 1H), 2.67 (m, 1H), 2.76 (dd, *J* = 4.06, 8.70 Hz, 1H), 2.81 (d, *J* = 5.80 Hz, 1H), 2.89 (m, 1H), 2.92 (q, *J* = 7.54 Hz, 2H), 4.03 (t, *J* = 8.70 Hz, 1H), 4.12 (q, *J* = 7.25 Hz, 2H), 7.22-7.32 (m, 5H); 13C NMR (125MHz, CDCl3) δ 14.8, 15.3, 20.1, 24.4, 31.5, 38.4, 42.2, 58.1, 61.3, 71.8, 127.2, 129.2, 130.1, 138.9, 174.5, 201.3; EIMS *m/z* (relative intensity): 338 (M+ 1.0), 320 (0.1), 293 (1.7), 279 (0.2), 277 (4.6), 256 (6.1), 247 (38.6), 231( 8.6), 213 (25.2), 203 (11.8), 185 (81.4), 171 (13.5), 157 (26.7), 143 (68.2), 128 (23.9), 119 (10.9), 103 (25.0), 91(100); Anal. Calcd for C18H26O4S: C, 63.87; H, 7.74; S, 9.47. Found: C, 63.78; H, 7.51; S, 9.53.

**(3*R********,4*R********, 5*S********)-4-Ethylsulfanylcarbonyl-5-hydroxy-3-methyl-undecanoic acid ethyl ester (7d)**: This compound was obtained in 81% yield according to the above procedure for **3a** as a colourless oil: TLC, R*f* 0.37 (85:15 hexane/EtOAc); FT-IR (neat) 3500 (br), 2959, 2931, 1735, 1676, 1376, 1181, 1033 cm-1; 1H NMR (500MHz, CDCl3) δ 0.86-0.88 (m, 3H), 1.08 (d, *J* = 6.96 Hz, 3H), 1.23-1.33 (m, 15H), 1.39-1.56 (m, 3H), 2.14-2.18 (m, 1H), 2.54-2.56 (m, 2H), 2.82-2.90 (m, 2H), 3.72-3.73 (m, 1H), 4.13-4.18 (m, 2H); 13C NMR (125MHz, CDCl3) δ 14.7, 14.9, 15.3, 16.8, 20.7, 23.3, 24.2, 26.4, 29.8, 32.5, 35.8, 38.2, 65.6, 70.9, 77.4, 175.1, 201.6; EIMS *m/z* (relative intensity): 332 (M+ 2.5), 317 (1.3), 287 (4.8), 271 (54.0), 253 (55.7), 247 (6.8), 225 (59.1), 218 (30.5), 207 (24.7), 185 (34.8), 179 (30.2), 157 (63.2), 139 (18.6), 128 (56.0), 113 (13.1), 101 (35.2), 83 (22.4), 69 (100); Anal. Calcd for C17H32O4S: C, 61.41; H, 9.70; S, 9.64. Found: C, 61.38; H, 9.64; S, 9.71.

**(3*R********,4*R********,5*S********)-5-Cyclohexyl-4-ethylsulfanylcarbonyl-5-hydroxy-3-methyl-pentan oic acid ethyl ester (7e):** This compound was obtained in 54% yield according to the above procedure for **3a** as a colourless oil: TLC, R*f* 0.31 (85:15 hexane/EtOAc); FT-IR (neat) 3500 (br), 2966, 2854, 1733, 1678, 1451, 1376, 1182 cm-1; 1H NMR (500MHz, CDCl3) δ 1.10 (d, *J* = 7.09 Hz, 3H), 1.12-1.24 (m, 3H), 1.24-1.32 (m, 8H), 1.33-1.34 (m, 2H), 1.50-1.56 (m, 1H), 1.60-1.65 (m, 1H), 1.72-1.85 (m, 3H), 2.16 (dd, *J* = 6.80, 16.72 Hz, 1H), 2.59-2.61 (m, 1H), 2.84-2.92 (m, 4H), 3.59-3.60 (m, 1H), 4.12-4.17 (m, 2H); 13C NMR (125MHz, CDCl3) δ 14.9, 15.4, 20.8, 24.2, 26.4, 26.9, 27.1, 29.5, 31.5, 38.1, 41.5, 53.9, 61.6, 175.1, 201.7; EIMS *m/z* (relative intensity): 330 (M+ 0.5), 285 (3.4), 269 (19.8), 251 (33.7), 247 (10.0), 223 (22.2), 218 (38.4), 205 (69.8), 179 (47.0), 157 (100), 139 (26.8), 128 (96.4), 101 (51.5); Anal. Calcd for C17H30O4S: C, 61.78; H, 9.15; S, 9.70. Found: C, 61.81; H, 9.01; S, 9.58.

**(3*R********,4*R********,5*S********)-4-Ethylsufanylcarbonyl-5-hydroxy-3-methyl-7-phenyl-hept-6-enoic acid ethyl ester** **(7f)**: This compound was obtained in 51% yield according to the above procedure for **3a** as a colourless oil: TLC, R*f* 0.25 (4:1 hexane/EtOAc); FT-IR (neat) 3430 (br), 2969, 1732, 1678, 1375, 1262, 1180 cm-1; 1H NMR (500MHz, CDCl3) δ 1.13 (d, *J* = 7.08 Hz, 3H), 1.16 (t, *J* = 7.37 Hz, 3H), 1.27 (t, *J* = 7.08 Hz, 3H), 2.24 ( dd, *J* = 7.08, 16.44 Hz, 1H), 2.80 (q, *J* = 7.37 Hz, 2H), 2.83-2.90 (m, 3H), 2.95 (d, *J* = 3.68 Hz, 1H), 4.18 (q, *J* = 7.08 Hz, 2H), 4.47 (t, *J* = 7.08 Hz, 1H), 6.22 (dd, *J* = 7.09, 5.87 Hz, 1H), 6.60 (d, *J* = 5.87 Hz, 1H), 7.22-7.37 (m, 5H); 13C NMR (125MHz, CDCl3) δ 14.2, 14.9, 20.1, 24.4, 29.9, 38.6, 61.4, 65.3, 72.4, 127.3, 128.5, 129.2, 130.7, 132.8, 137.3, 172.9, 201.0; EIMS *m/z* (relative intensity): 321 (M+-Et 1.2), 304 (1.1), 289 (17.5), 260 (11.3), 243 (14.0), 214 (9.7), 201 (3.8), 183 (5.1), 173 (23.1), 156 (30.8), 148 (49.6), 133 (100), 115 (59.3), 101 (90.8), 91 (47.8); Anal. Calcd for C19H26O4S: C, 65.11; H, 7.48; S, 9.15. Found: C, 61.22; H, 7.21; S, 9.11.
